# Supplementary material for: Morpholino Oligomer-Induced Dystrophin Isoforms to Map the Functional Domains in the Dystrophin Protein
Source: PubMed Central journal article supplement — Mol Ther Nucleic Acids. 2020 Aug 21;22:263–72. doi: 10.1016/j.omtn.2020.08.019 (PMC7516190; doi:10.1016/j.omtn.2020.08.019), 2020-08-21
Supplement: mmc1.pdf [file mmc1.pdf]

**OMTN, Volume 22**

**Supplemental Information**

**Morpholino Oligomer-Induced Dystrophin**

**Isoforms to Map the Functional**

**Domains in the Dystrophin Protein**

**Dunhui Li, Abbie M. Adams, Russell D. Johnsen, Susan Fletcher, and Steve D. Wilton**

## **Supplemental information**

### **Morpholino Oligomer-Induced Dystrophin Isoforms to Map the Functional Domains in the Dystrophin Protein**

Dunhui Li, Abbie Adams, Russell Johnsen, Sue Fletcher, Steve Wilton

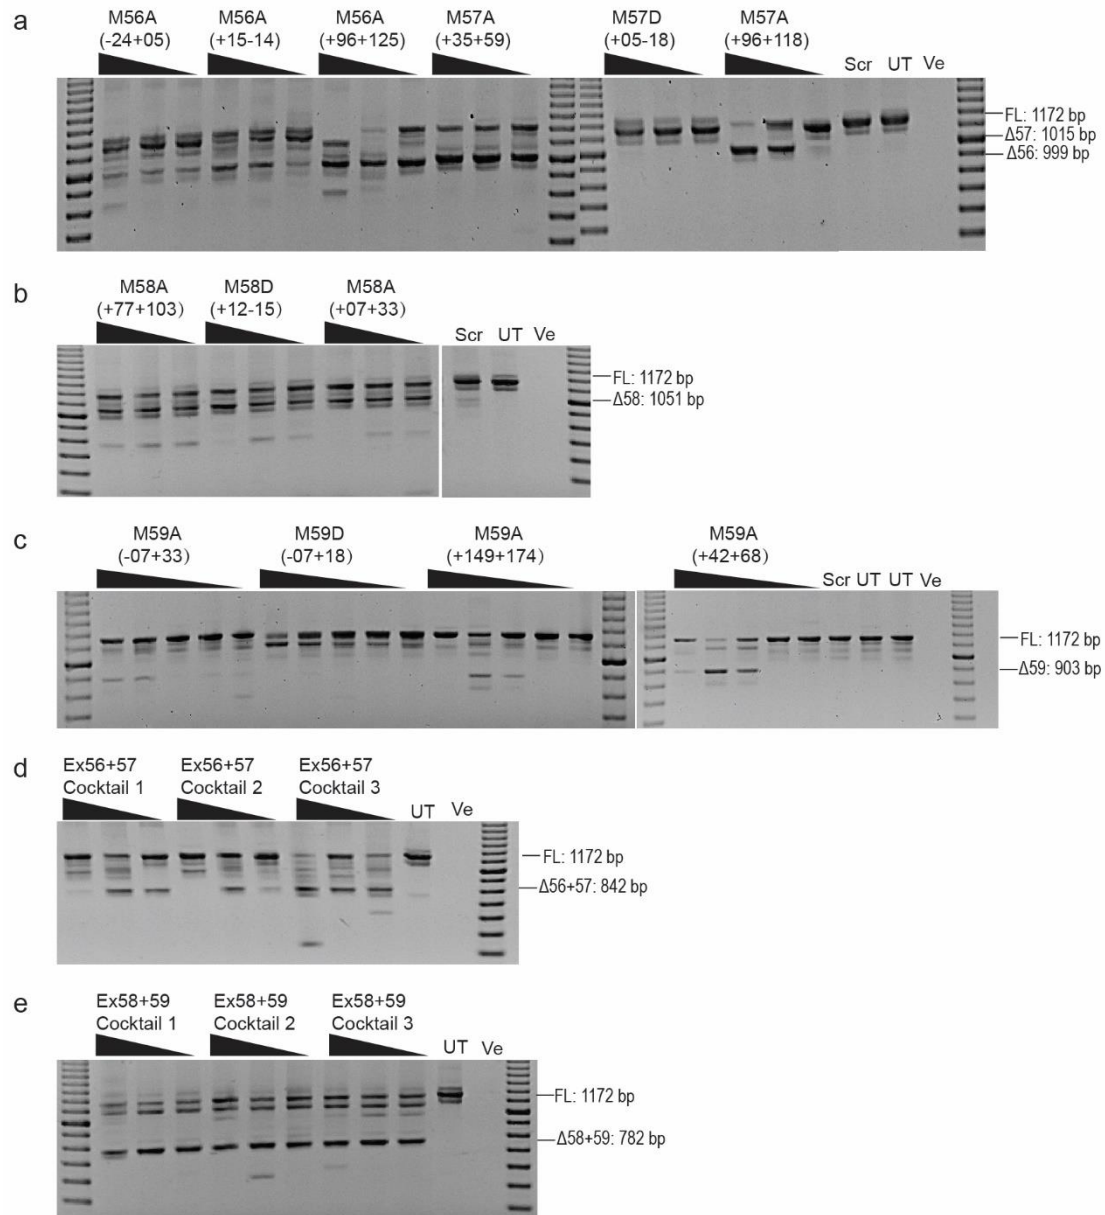

**Figure S1. *In vitro* screening of 2'-O-Methyl antisense oligonucleotides to induce dystrophin isoforms.** Nested RT-PCR analysis of DMD transcripts confirming the individual or dual skipping of exon 56, 57, 58 and 59. An RT-PCR no template negative control was loaded in the final lane. Transcript product size in base pairs (bp) are indicated by 100 bp DNA ladder. (a) Analysis of exon 56 or exon 57 skipping in vitro after 2'-O-Methyl AO treatment; (b) The level of exon 58 skipping detected by nested RT-PCR in mouse myogenic cells; (c) Analysis of exon 59 skipping; (d) The level of exons 56+57 skipping after 2'-O-Methyl AO cocktail treatment; (e) Analysis of exons 58+59 skipping in vitro. FL: full-length amplicon; Δ56: exon 56 skipped amplicon; Δ57: exon 57 excised amplicon; Δ58: exon 58 removed transcript; Δ59: exon 59 skipped transcript; Scr: scrambled sequence control AO; UT: untreated; Ve: no template negative control.

a

|             |                                                              |
|-------------|--------------------------------------------------------------|
| DMD_Chicken | RLGILLHDSIQIPRQLGEVAFGGSNIEPSVRSQFQANNKPEIEAALFLDWMRLEPQSM   |
| DMD_MOUSE   | RLGILLHDSIQIPRQLGEVAFGGSNIEPSVRSQFQANNKPEIEAALFLDWMRLEPQSM   |
| DMD_HUMAN   | RLGILLHDSIQIPRQLGEVAFGGSNIEPSVRSQFQANNKPEIEAALFLDWMRLEPQSM   |
| DMD_PIG     | RLGILLHDSIQIPRQLGEVAFGGSNIEPSVRSQFQANNKPEIEAALFLDWMRLEPQSM   |
|             | *****                                                        |
| DMD_Chicken | VWLPVLRVAAAETAKHQAKCNICKECPIIGFRVYRSLKHFNYDICQSCFFSGRVAKGHKM |
| DMD_MOUSE   | VWLPVLRVAAAETAKHQAKCNICKECPIIGFRVYRSLKHFNYDICQSCFFSGRVAKGHKM |
| DMD_HUMAN   | VWLPVLRVAAAETAKHQAKCNICKECPIIGFRVYRSLKHFNYDICQSCFFSGRVAKGHKM |
| DMD_PIG     | VWLPVLRVAAAETAKHQAKCNICKECPIIGFRVYRSLKHFNYDICQSCFFSGRVAKGHKM |
|             | *****                                                        |
| DMD_Chicken | HYPMVEYCTPTTSGEDVRDFAKVLKKNKFRTRKYFAKHPRMGYLPVQTVLEGNMTPVTL  |
| DMD_MOUSE   | HYPMVEYCTPTTSGEDVRDFAKVLKKNKFRTRKYFAKHPRMGYLPVQTVLEGNMTPVTL  |
| DMD_HUMAN   | HYPMVEYCTPTTSGEDVRDFAKVLKKNKFRTRKYFAKHPRMGYLPVQTVLEGNMTPVTL  |
| DMD_PIG     | HYPMVEYCTPTTSGEDVRDFAKVLKKNKFRTRKYFAKHPRMGYLPVQTVLEGNMTPVTL  |
|             | *****                                                        |
| DMD_Chicken | INFWPVDSAPASSPQLSHDDTHSRIEHYASRLAEMENSGSYLNDSISPNEISJDEHELLI |
| DMD_MOUSE   | INFWPVDSAPASSPQLSHDDTHSRIEHYASRLAEMENSGSYLNDSISPNEISJDEHELLI |
| DMD_HUMAN   | INFWPVDSAPASSPQLSHDDTHSRIEHYASRLAEMENSGSYLNDSISPNEISJDEHELLI |
| DMD_PIG     | INFWPVDSAPASSPQLSHDDTHSRIEHYASRLAEMENSGSYLNDSISPNEISJDEHELLI |
|             | *****                                                        |

b

|             |                                                                |
|-------------|----------------------------------------------------------------|
| DMD_Chicken | EYFLDLEKFLAWL TEAETTANVLQDATHKEKTLQVRELMKQWDLQAEIDAHTDIF       |
| DMD_MOUSE   | QFPLDLEKFLSWITEAETTANVLQDASRKEKLLDSRGVRELMKQWDLQGEIETHTDIY     |
| DMD_HUMAN   | QFPLDLEKFLAWL TEAETTANVLQDATHKERLLEDKSGVRELMKQWDLQGEIEAHTDVIY  |
| DMD_PIG     | QFPLDLEKFLAWL TEAETTANVLQDATHKERLLEDKSGVRELMKQWDLQGEIEAHTDVIY  |
|             | :* *****:.* *****:.*: ** :*:* ** ** ** **:*****:               |
| DMD_Chicken | HNLDENGQKILRSLEGS EDAVLLQRRLDNMNFKWSEL RKKSLNIRSHLEASDQWKRLLHL |
| DMD_MOUSE   | HNLDENGQKILRSLEGSDEAPLLQRRLDNMNFKWSELQKSLNIRSHLEASSDQWKRLLHL   |
| DMD_HUMAN   | HNLDENSQKILRSLEGSDDAVLLQRRLDNMNFKWSEL RKKSLNIRSHLEASSDQWKRLLHL |
| DMD_PIG     | HNLDENGQKILRSLEGSDDAVLLQRRLDNMNFKWSEL RKKSLNIRSHLEASSDQWKRLLHL |
|             | ***** .*****:.* *****:.* *****:.* *****:.* *****               |
| DMD_Chicken | SLQELLVWLQLKDELSRQAPIGGDIPTVQKQNDVHRFAFKRELKTKEPVMNALETVRIF    |
| DMD_MOUSE   | SLQELLVWLQLKDELSRQAPIGGDFPAVQKQNDIHRFAFKRELKTKEPVMSTLETVRIF    |
| DMD_HUMAN   | SLQELLVWLQLKDELSRQAPIGGDFPAVQKQNDVHRFAFKRELKTKEPVMSTLETVRIF    |
| DMD_PIG     | SLQELLVWLQLKDELSRQAPIGGDCPAVQKQNDVHRFAFKRELKTKEPVMSTLETVRIF    |
|             | ***** .*****:.*:***** * .*****:.* *****:.* *****:.*            |

**Figure S2. Alignment of dystrophin protein sequences across species.** Human, pig, chicken and mouse dystrophin protein sequences were obtained from Ensembl (<http://asia.ensembl.org/index.html>) and aligned with Clustal Omega program (<https://www.ebi.ac.uk/Tools/msa/clustalo/>). (a) Highly conserved sequences across species in the dystrophin C-terminal region, especially region encoded by exon 68 to exon 73; (b) Less conserved sequences encoded by DMD exons 56+57; Sequences encoded by DMD exon 68 are in black rectangle box, sequences encoded by exon 73 in blue, and sequences encoded by exons 56+57 are in red.

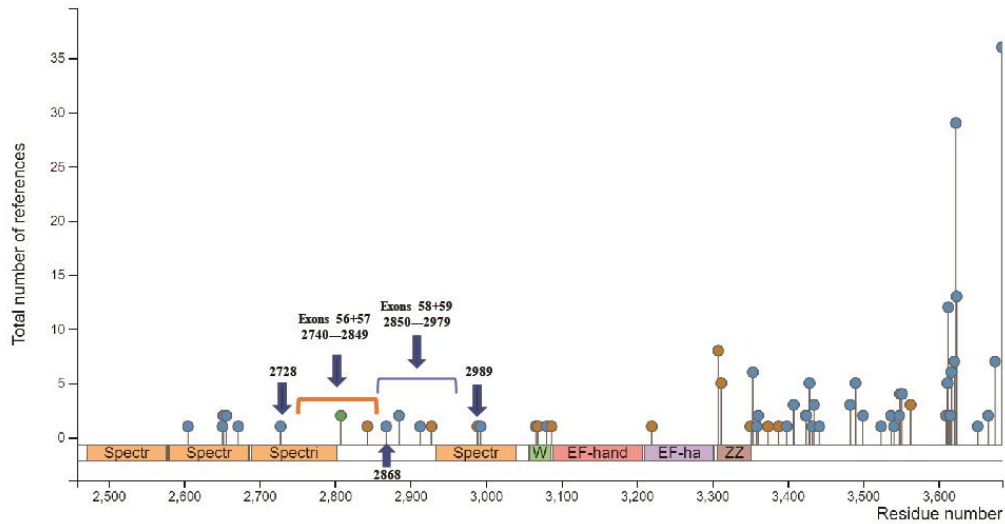

**Figure S3. Predicted phosphorylation sites in the protein regions encoded by DMD exons 56+57 and exons 58+59.** Absence of predicted phosphorylation sites in the exons 56+57 coding region (<http://www.PhosphoSite.org>), however there are three predicted phosphorylation sites in protein region encoded by the DMD exons 58+59.

**Table S1.** Potential exon skipping strategies to make in-frame dystrophin isoforms.

| Exon/exons to be skipped | Known functional motifs involved        |
|--------------------------|-----------------------------------------|
| 56/57                    | No known motifs                         |
| 58/59                    | No known motifs                         |
| 60                       | No known motifs                         |
| 59-61                    | Hinge 4                                 |
| 62/63                    | WW domain                               |
| 62-64                    | WW domain                               |
| 64                       | No known motifs                         |
| 65/66                    | EF-hands                                |
| 64-66                    | EF-hands                                |
| 62-66                    | WW domain and EF-hands                  |
| 66-68                    | ZZ domain                               |
| 68/69                    | ZZ domain                               |
| 69/70                    | ZZ domain                               |
| 70-75                    | Syntrophins binding sites and CC domain |
| 71/72                    | No known motifs                         |
| 72                       | No known motifs                         |
| 71-73                    | Alpha 1-syntrophin binding site         |
| 72/73                    | Alpha 1-syntrophin binding site         |
| 73                       | No known motifs                         |
| 71-74                    | Syntrophins binding sites and CC domain |
| 73/74                    | Syntrophins binding sites and CC domain |
| 74                       | Beta 1-syntrophin binding site          |
| 72-74                    | Syntrophins binding sites and CC domain |
| 76-78                    | No known motifs                         |
| 77                       | No known motifs                         |

**Table S2. Antisense oligonucleotide and primer sequences**

| PMO coordinates | Sequences (5'-3')               |
|-----------------|---------------------------------|
| M23D (+7-18)    | GGCCAAACCTCGGCTTACCTGAAAT       |
| M56A (+96 +125) | TATCCAAACGTCTTTGTAAACAGGGGTGCTT |
| M57A (+96 +118) | CCACCGATGGGTGCCTGACGGCT         |
| M58A (+07 +33)  | AGGTTCTTTAGTTTTCAATTCCTCTT      |
| M59A (+42 +68)  | GTTGACCTCTTCAGCCTGCTTTCGTAG     |
| M70A (+04 +31)  | CGAAGTCGCGAACATCTTCTCCGGATGT    |
| Primer names    | Sequences (5'-3')               |
| DmdEx20F        | CCCAGTCTACCACCTATCAGAGC         |
| DmdEx26R        | TTCTTCAGCTTGTGTCATCC            |
| DmdEx51Fo       | TCTCTGCTTGATCGAGTTATAA          |
| DmdEx60Ro       | TTCCAAAGTGCTGAGCTTATAAG         |
| DmdEx53Fi       | AAGGTCCTCACACAGTAGAT            |
| DmdEx60Ri       | CAAGGTCATTGACACGATTG            |
| DmdEx65Fo       | ATCTCTTGAGCCTGTCAGC             |
| DmdEx78Ro       | CTCTGCCCAAATCATCTGC             |
| DmdEx66Fi       | CACACTTGGAAGACAAGTACAG          |
| DmdEx77Ri       | CTCTTGAAGTAGGGAAGGAGT           |

PMO: phosphorodiamidate morpholino oligomers; Ex: exon; F: forward primer; R: reverse primer; Fo: outer forward primer; Ro: outer reverse primer; Fi: inner forward primer; Ri: inner reverse primer.

**Table S3. List of 2'-O-Methyl antisense oligonucleotides and antisense oligonucleotide cocktails for *in vitro* screening.**

| <b>2'-O-Methyl antisense oligonucleotides</b> |                                   |
|-----------------------------------------------|-----------------------------------|
| AO coordinates                                | Sequences (5'-3')                 |
| M56A (-24+05)                                 | AGAUCUACCAGAAAGCAAUAAAACACAU      |
| M56D (+15-14)                                 | UGAUCAUUGCCUACCUAUGUUGAGAGAC      |
| M56A (+96+125)                                | UAUCCAAACGUCUUUGUAACAGGGGUGCUU    |
| M57A (+35+59)                                 | GUUCCUGAAGAGAAAGAUGCAAACG         |
| M57D (+05-18)                                 | GUCUCUAAAGCAUCCCUAU               |
| M57A (+96+118)                                | CCACCGAUGGGUGCCUGACGGCU           |
| M58A (+77+103)                                | UUUCUCUAGUCCUCCAAAGGCUGCUC        |
| M58D (+12-15)                                 | UCCACAUUCAAUUACCUCUGGGCUCCU       |
| M58A (+07+33)                                 | AGGUUCUUUAGUUUCAAUCCCUCUU         |
| M59A (-07+18)                                 | UUUCUUCAGGAGGCAGUUCUAAAUU         |
| M59D (+02-24)                                 | GGAACAAAACAAAGCACACAGUACCU        |
| M59A (+149+174)                               | GUCCAGUUCAUCGGCAGCUUCCUGAA        |
| M59A (+42+68)                                 | GUUGACCUCUUCAGCCUGCUUUCGUAG       |
| <b>2'-O-Methyl cocktails</b>                  |                                   |
| Names                                         | AOs included                      |
| Ex56+57 cocktail 1                            | M56A (-24+05) and M57A (+96+118)  |
| Ex56+57 cocktail 2                            | M56D (+15-14) and M57A (+96+118)  |
| Ex56+57 cocktail 3                            | M56A (+96+125) and M57A (+96+118) |
| Ex58+59 cocktail 1                            | M58A (+77+103) and M59A (+42+68)  |
| Ex58+59 cocktail 2                            | M58D (+12-15) and M59A (+42+68)   |
| Ex58+59 cocktail 3                            | M58A (+07+33) and M59A (+42+68)   |
